# Supplementary material for: Transcriptomic landscape of cumulus cells from patients <38 years old with a history of poor ovarian response (POR) treated with platelet-rich plasma (PRP)
Source: publisher site journal article supplement (doi:10.18632/aging.206202), 2025-02-18
Supplement: Supplementary file [file aging-vnull-206202-supplementary-material-SD1.pdf]

**SUPPLEMENTARY FIGURE**

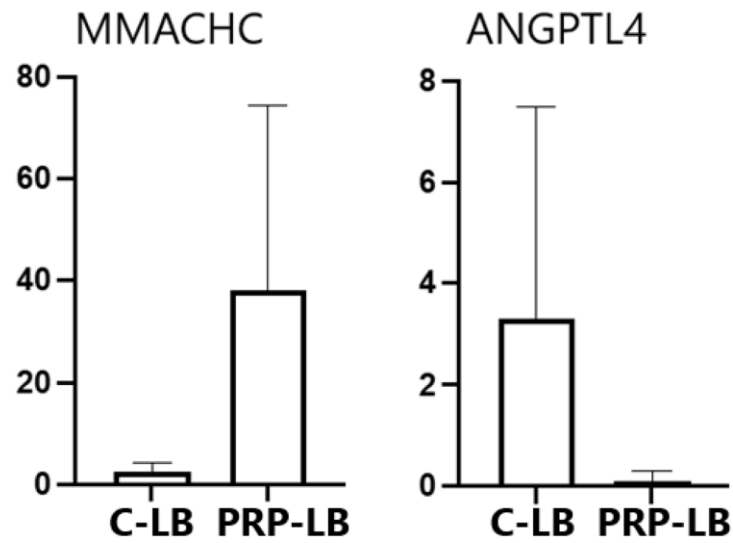

**Supplementary Figure 1.** RT-PCR results of the two confirmatory genes (MMACHC and ANGPTL4) for validation of RNA-Seq results. MMACHC Mann-Whitney test  $p$ -value 0.0286, ANGPTL4  $p$ -value 0.0317.
