# Supplementary material for: Transcriptomic landscape of cumulus cells from patients <38 years old with a history of poor ovarian response (POR) treated with platelet-rich plasma (PRP)
Source: publisher site journal article supplement (doi:10.18632/aging.206202), 2025-02-18
Supplement: Supplementary file [file aging-vnull-206202-supplementary-material-SD2.pdf]

## SUPPLEMENTARY TABLE

**Supplementary Table 1. The primers used for RT-PCR analysis for confirmation of validity of RNA-Seq results.**

| <b>ANGPTL4</b> |                       |
|----------------|-----------------------|
| Forward primer | GTCCACCGACCTCCCGTTA   |
| Reverse primer | CCTCATGGTCTAGGTGCTTGT |
| <b>MMACHC</b>  |                       |
| Forward primer | ATGGAGCCGAAAGTCGCAG   |
| Reverse primer | CTGGAAGGGGTAAACCTCGAA |
